# Supplementary material
Source: publisher site journal article supplement (https://www.dovepress.com/article/273875)

**Supplementary Information**

**eTable 1. Results of the statistical analyses on the pre/post measures**

Results of the Class × Time ANCOVAs on pre/post measures (Pittsburgh Sleep Quality Index [PSQI], Epworth Sleepiness Scale [ESS], Morningness–Eveningness Questionnaire [MEQ], and academic performance, expressed as log-transformed grades) with gender considered as a covariate. Bold values denote statistical significance at the p ≤ 0.05 level.

|  | **Class** | | **Time** | | **Class x Time** | | **Covariate (Gender)** | |
| --- | --- | --- | --- | --- | --- | --- | --- | --- |
|  | F (d.f.) | p | F (d.f.) | p | F (d.f.) | p | Wilk's Lambda  Rao R (6,43) | p |
| **PSQI** | 0.34 (1.26) | 0.56 | 0.002 (1,26) | 0.96 | 3.28 (1,26) | 0.08 | 0.96  0.53 | 0.60 |
| **ESS** | 0.08 (1,24) | 0.77 | 0.13 (1,24) | 0.72 | 3.72 (1,24) | 0.06 | 0.93  0.89 | 0.42 |
| **MEQ** | 1.14 (1,26) | 0.30 | **4.38 (1,26)** | **0.05** | 1.30 (1,26) | 0.26 | 0.99  0.06 | 0.94 |
| **Academic performance** | **16.89 (1, 40)** | **0.0002** | **30.06 (1,40)** | **0.000002** | **3.77 (1, 40)** | **0.05** | 0.92  1.71 | 0.19 |

**eTable 2.** **Results of the statistical analyses on the measures of school tardiness**

Results on the Class x Month ANCOVAs on the number (square root transformed) of tardies and early leavers, with gender considered as a covariate. Bold values denote statistical significance at the p ≤ 0.05 level.

|  | **Class** | | **Month** | | **Class x Month** | | **Covariate (Gender)** | |
| --- | --- | --- | --- | --- | --- | --- | --- | --- |
|  | F (1,48) | p | F (5,245) | p | F (5, 245) | p | Wilk's Lambda  Rao R (6,43) | p |
|  |  |  |  |  |  |  |  |  |
| **Tardies** | 0.03 | 0.85 | **8.08** | **<0.00000001** | **1.97** | **0.05** | 0.78  1.42 | 0.22 |
| **Early** leavers | 2.06 | 0.16 | **4.10** | **0.0002** | **2.01** | **0.05** | 0.92  0.65 | 0.69 |

**eFigure 1. Tardies and early leavers across the academic year**

Means (and SE) of cases (square root transformed) of tardies and early leaving across the academic year in the late and early start classes.

*p≤ 0.05 ** p≤ 0.01


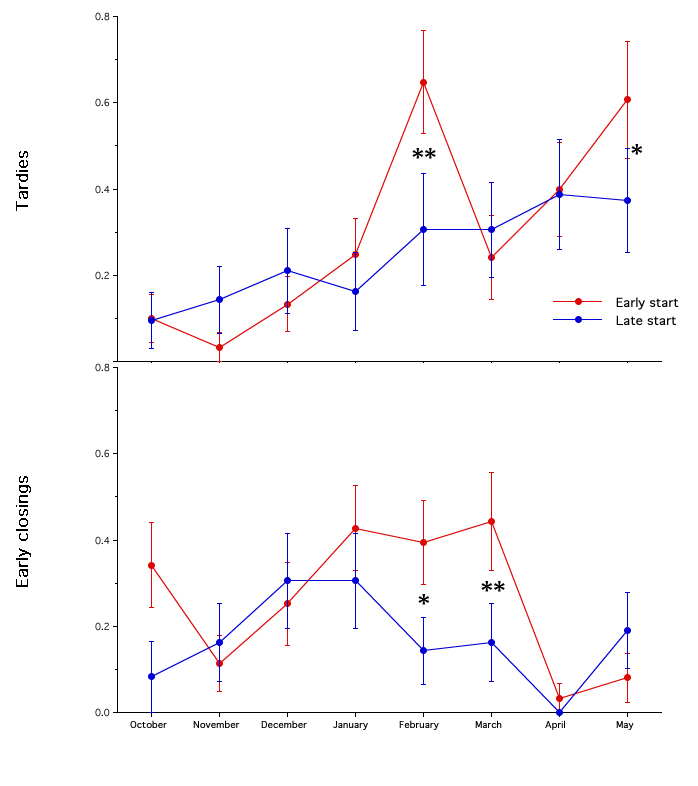

Supplement: Supplementary file 1 [file get_supplementary_file.php]
